# Supplementary material for: Measurement Report: important contributions of oxygenated compounds to emissions and chemistry of VOCs in urban air
Source: Copernicus journal article supplement (doi:10.5194/acp-2020-152), 2020-05-07
Supplement: Supplementary file [file acp-2020-152-AC2-supplement.pdf]

## Response to Reviewers' comments

### Reviewer 2

*This manuscript presents an analysis of atmospheric VOCs in Guangzhou over roughly a two-month intensive sampling period, Sept-Nov 2016. The authors use the significant uncalibrated and/or unattributed ion response from a high-resolution PTR-MS instrument to estimate the total OH reactivity and compare this quantity to a direct measurement.*

*This type of analysis has been published previously, as the authors acknowledge and rely upon as a basis for their own work. The combination of the setting of their measurements in the Pearl River Delta and the use of a state-of-the-art instrument make this manuscript scientifically important. The writing is clear and presented in a logical format.*

*Generally, this manuscript is missing error analysis and an adequate description of the many ions that were observed. The authors often will make a simplifying assumption for their data to ease their analysis, but either do not provide enough information to allow the reader to evaluate this assumption (e.g. OH reactivities of detected ions) or perhaps over-simplify in spite of their own data indicating a more detailed analysis is warranted (e.g. assumed sensitivities). The authors provide only cursory description of measurement uncertainties, and instead rely upon the observed dynamic range of reported mixing ratios or signal in section 3.3 (Sources analysis of OVOCs). Even these ranges are dropped in 3.4 (OH Reactivity) and the results from this section, which hinge upon numerous assumptions presented earlier, are stated with far greater precision than is merited. This can be contrasted with other manuscripts that have previously presented this type of analysis (e.g. De Gouw et al., 2009) that the authors cite.*

*While I do have some criticisms of this manuscript, I believe that this work should be accepted for publication with revisions to address these issues.*

*Reply: We are very grateful for all the detailed comments and the valuable suggestions, which helped us greatly in improving our manuscript. Please find the response to individual comments below.*

*Regarding of error analysis suggested by the reviewer, we have provided more*

related information in the revised manuscript. In this manuscript, our main conclusion is the important roles of oxygenated species in VOCs in terms of both concentrations and OH reactivity. This conclusion heavily rely on quantification of the uncalibrated species in the mass spectra of PTR-ToF-MS. As a result, the main uncertainty throughout the analysis in section 3.3 and section 3.4 comes from the errors in both concentration and OH rate constants of these uncalibrated species.

For the determination of sensitivity for uncalibrated species by PTR-ToF-MS, we re-checked the relationship between sensitivity and rate constants for proton-transfer reactions of  $\text{H}_3\text{O}^+$  with VOCs. We obtained reasonable correlation, after considering the effect of higher energetic collisions on rate constant for proton-transfer reactions in the drift tube. This relationship is used to calculate sensitivities for uncalibrated species by PTR-ToF-MS. The quantification for these uncalibrated species would be more reasonable than using the average response from calibrated VOCs. Following the discussions in previous studies, the uncertainties for concentrations of these uncalibrated species are around 50%. We explicitly include this information in the revised manuscript and discuss the effects in the analysis of section 3.3 and 3.4.

For the rate constants of VOCs in calculating OH reactivity, the values of various VOCs are taken from previous literatures (Atkinson and Arey, 2003; Atkinson et al., 2004; Atkinson et al., 2006; Koss et al., 2018). For ions detected by PTR-ToF-MS, the rate constants of the determined or assumed dominant isomers are used, following identification of these ions in previous studies (Koss et al., 2018; Gilman et al., 2015). As the attribution of various ions to specific compounds are not explicitly available for many ions detected by PTR-ToF-MS, the uncertainties of rate constants of many ions can be large, especially for the uncalibrated species. Considering large differences between OH rate constants for isomers (e.g. ketone vs aldehyde), we believe the uncertainty in rate constants can be on the order of 100%. The effect of this uncertainty in missing reactivity is included in the revised manuscript.

**As discussed in section 2.2, a total of 31 VOCs species were calibrated using either gas cylinders or liquid standards. For other VOCs, we used the method proposed in Sekimoto et al. (2017) to determine the relationship between VOCs sensitivity and kinetic rate constants for proton-transfer reactions of  $\text{H}_3\text{O}^+$  with VOCs (detailed discussions in the SI). As shown in Figure 3, a clear linear relationship was obtained. The fitted line in Figure 3 is used to determine sensitivities of the uncalibrated species. Following the discussions in Sekimoto et**

al. (2017), uncertainties of the concentrations for uncalibrated species are around 50%.

Adding up these contributions, it significantly narrows the gap between the measured and calculated OH reactivity, leaving only 11% of OH reactivity as “missing” during the campaign. Considering the large uncertainties for both concentrations (~50%) and rate constants of the uncalibrated species (on the order of 100%), the missing reactivity can range in 0%-19%. Nevertheless, the determined missing reactivity would be well below the estimated uncertainty (20%) for the OH reactivity measurements by the CRM method, indicating that gap between measured and calculated reactivity can be significantly narrowed after taking into account all of the species by PTR-ToF-MS.

*Specific comments*

*Line 39-44. The authors cite a number of percentage contributions of OVOCs, HCs, etc. to the total VOC burden. These values are overly precise and lack a statement of uncertainty. Uncertainties should be in the abstract, and significant digits should be made appropriate based upon those uncertainties.*

Reply: Thanks for the reminder.

These values have been modified to:

**OVOC-related ions dominated PTR-ToF-MS mass spectra with an average contribution of 73%±9%. Combining measurements from PTR-ToF-MS and GC-MS/FID, OVOCs contribute 57%±10% to the total concentration of VOCs. Using concurrent measurement of OH reactivity, OVOCs measured by PTR-ToF-MS contribute greatly to the OH reactivity (19%±10%). In comparison, hydrocarbons account for 21%±11% of OH reactivity. Adding up the contributions from inorganic gases (48%±15%), ~11% of the OH reactivity remains as “missing”.**

*Line 108. “Field measurements were conducted . . .” Figure S1 shows a map of the local region but is never cited in the text.*

Reply: We have cited Figure S1 in the revised manuscript.

**Field measurements were conducted at an observation site in Guangzhou (113.2°E, 23°N) from September to November 2018. The sampling site (~25 m above the ground level) is located on the 9th floor of a building on the campus of Guangzhou Institute of Geochemistry, Chinese Academy of Sciences, which is**

regarded as a typical urban site in Guangzhou (Figure S1).

*Line 114. “commercial PTR-QiToF-MS”. The authors should provide a brief description of this instrument, specifically with regards to the meaning of “QiToF”.*

Reply: This description has been added in the Section 2 of the revised manuscript.

**During the campaign, a commercial PTR-QiToF-MS (Ionicon Analytic GmbH, Innsbruck, Austria) with  $\text{H}_3\text{O}^+$  chemistry and  $\text{NO}^+$  chemistry was used to measure VOCs in the atmosphere. PTR-QiToF-MS is equipped with a quadrupole ion guide for effective transfer of ions from the drift tube to the time-of-flight mass spectrometer, and “Qi” here stands for “quadrupole interface” (Sulzer et al., 2014). It has been shown that the new quadrupole interface greatly improves sensitivity of VOC detection (Sulzer et al., 2014).**

*Line 116. “Ambient air was continuously . . .” Figure S2 shows the plumbing scheme for the instrument but is never cited in the text.*

Reply: We have cited it in the revised manuscript.

**Ambient air was continuously introduced through an 8 m long PFA Teflon tubing (1/4”) into PTR-ToF-MS with an external pump (5.0 L/min) (Figure S2).**

*Line 117. “Teflon tubing” Which type of Teflon tubing is this (e.g. PFA, FEP, PTFE)?*

Reply: The type of Teflon tubing is PFA. We have indicated it in the revised manuscript.

**Ambient air was continuously introduced through an 8 m long PFA Teflon tubing (1/4”) into PTR-ToF-MS with an external pump (5.0 L/min) (Figure S2). The PFA Teflon tubing was wrapped with a self-controlled heater wire (40 °C) to prevent air condensation inside the tubing.**

*Line 119-120. “the PTR-ToF-MS automatically switched between  $\text{H}_3\text{O}^+$  and  $\text{NO}^+$  chemistry every 10-20 minutes” The authors should provide a description of how this was accomplished, or a reference if this was previously published.*

Reply: We included more details about the automatic switches between  $\text{H}_3\text{O}^+$  chemistry and  $\text{NO}^+$  chemistry in the revised manuscript:

**During the campaign, the PTR-ToF-MS automatically switched between**

$\text{H}_3\text{O}^+$  and  $\text{NO}^+$  chemistry every 10-20 minutes. The built-in PTR-manager software (Ionicon Analytic GmbH, Innsbruck, Austria) offers the possibility to set programed sequences for switching between the two reagent ions. It takes ~10 s for  $\text{H}_3\text{O}^+$  and ~20 s for  $\text{NO}^+$  to re-equilibrate, when the measurement automatically switches between these two modes. The ambient measurement data during the transition period (~1 min) is not considered.

Line 127-129. “At this condition, the fractions of water-cluster ions are small, and the fragmentation of most VOCs product ions is not significant” This assumption is fundamental to the analysis presented in the remainder of the text, and the authors provide no evidence that this is true for their work. I would strongly suggest that they show some metric of the fragmentation and clustering that their instrument produced. A simple means would be to show the mass spectrum during a zero and calibration with known mixture (e.g. Apel Riemer standard) and quantify the ion(s) from each calibrant species.

Reply: We have added evidence of this assumption in the revised manuscript. The figure below shows the PTR-ToF-MS mass spectra from measurements of zero air and diluted gas standard with 5 ppb of various VOCs from a 16-component VOC gas standard (Apel Riemer Environmental Inc.). It can be seen that the fragmentation of most VOCs product ions is not significant, except monoterpene and ethanol, which are known to fragment significantly in PTR-MS. We included this graph in the SI of the revised manuscript.

At this condition, the fractions of water-cluster ions are small, and the fragmentation of most VOCs product ions is not significant (Figure S3) (de Gouw and Warneke, 2007; Yuan et al., 2017).

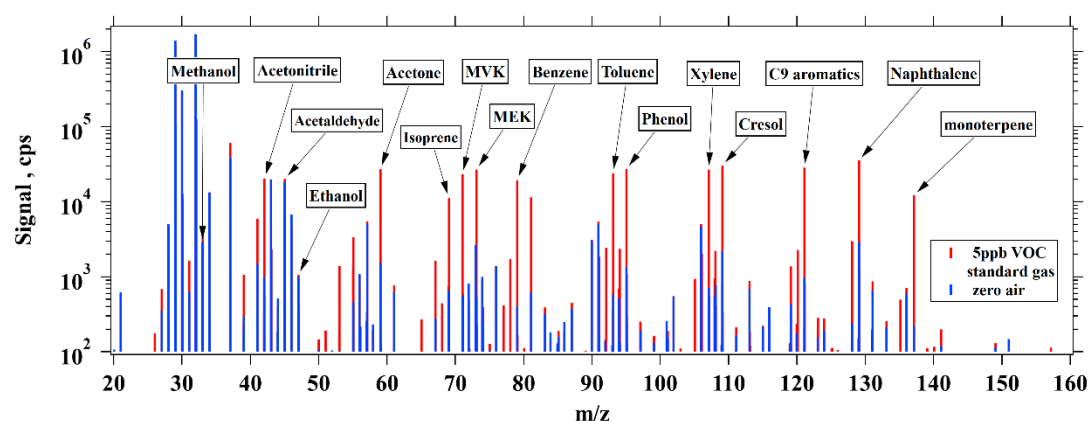

Figure S3. The mass spectra from measurements of zero air and diluted gas

standard with 5 ppb of various VOCs from a 16-component VOC gas standard.

*Line 130-131 “The additional species measured by NO<sup>+</sup> chemistry are discussed in a companion paper (Wang et al., 2020).” I did not find this listed in the reference section.*

Reply: We have re-updated the cited reference:

**The additional species measured by NO<sup>+</sup> chemistry are discussed in a companion paper (Wang et al., 2020a).**

*Line 153-154. “A total of 56 non-methane hydrocarbons (NMHCs) were measured using a gas chromatography-mass spectrometer/flame ionization detector (GC-MS/FID) system.” This description could use a few more details: at least sample frequency, sample collection time and volume.*

Reply: We have added the description of GC-MS/FID in Section 2.

**A total of 56 non-methane hydrocarbons (NMHCs) were measured using a gas chromatography-mass spectrometer/flame ionization detector (GC-MS/FID) system, coupled with a cryogen-free pre-concentration device (Wang et al., 2014). The system contains a two-channel sampling and GC column separation, able to measure C2-C5 hydrocarbons with the FID detection in one channel and measure C5-C12 hydrocarbons using MS detection in the other channel. The time resolution was 1 h, and ambient air was sampled during the first 5 minutes of each hour for both two channels with a flow of 300 ml/min. The uncertainties for VOC measurements by GC-MS/FID are estimated to be 15%-20% (Wang et al., 2014;Yuan et al., 2012a).**

*Line 158-160. “formaldehyde was also measured by a custom-built online instrument based on the Hantzsch reaction and absorption photometry from October 16 to November 20, 2018.” Is there any reference for this instrument? Can the authors provide LOD, sensitivity and/or accuracy for this measurement if not?*

Reply: This instrument has been reported in the reference by Zhu et al. (2020). We have added this reference to provide the detailed information of custom-built online instrument based on the Hantzsch reaction and absorption photometry. The limit of detection of formaldehyde is 25 pptv for Hantzsch analyzer.

The sentences are changed to:

In addition to PTR-ToF-MS, formaldehyde was also measured by a custom-built online instrument based on the Hantzsch reaction and absorption photometry from October 16 to November 20, 2018. The detailed description of this instrument can be found in Zhu et al. (2020).

*Line 164-165. "Formaldehyde measured by PTR-ToF-MS shows reasonable agreement with the Hantzsch formaldehyde instrument." The authors do not provide slopes for any of the plots in Figure S5 to allow the reader to evaluate. In particular, the slope of the formaldehyde inter-comparison looks to be approximately 2.5, which would not be a "reasonable agreement". The authors should discuss this discrepancy between the techniques, as the absolute mixing ratio of formaldehyde is important to understanding overall OH reactivity.*

Reply: The fitted slope of formaldehyde measured by Hantzsch formaldehyde instrument versus PTR-ToF-MS is 2.45. Both Hantzsch formaldehyde instrument and PTR-ToF-MS were calibrated toward formaldehyde during the campaign. Measurements of formaldehyde by PTR-ToF-MS is challenging, due to the strong dependence of sensitivity as a function of humidity. In this study, we calibrated formaldehyde at different humidity to derive the humidity dependence curve for formaldehyde sensitivity (Figure S5 in the revised manuscript and Figure S4 in the original manuscript). Previous studies showed that formaldehyde measurements by PTR-MS by taking into account humidity dependence agree with other techniques within a factor of 2 (Warneke et al., 2011; Inomata et al., 2008; Vlasenko et al., 2010). The reason for the larger difference observed in this study is unknown, which might be related to calibration issues for either of the two instruments.

We agree with the reviewer that HCHO is important in OH reactivity. We used formaldehyde measured by PTR-ToF-MS to calculate OH reactivity in the manuscript, which contribute 2.9% of the measured OH reactivity. If using formaldehyde measured by Hantzsch formaldehyde instrument, formaldehyde contribution would be 7.1%, which is 4.2% higher. This would influence the values determined for OH reactivity from OVOCs and also missing reactivity in section 3.4. This result emphasizes the importance to accurately measure formaldehyde in analysis of OH reactivity. However, the discrepancy for formaldehyde measurements would not change the conclusions in this study.

We include this related information in the revised manuscript:

Formaldehyde measured by PTR-ToF-MS shows good correlation with the Hantzsch formaldehyde instrument ( $R=0.83$ ), but concentrations measured by Hantzsch formaldehyde instrument are significantly higher than PTR-ToF-MS (slope=2.45). The reason for the large discrepancy is unknown. In the following discussions, formaldehyde measured by PTR-ToF-MS will be used.

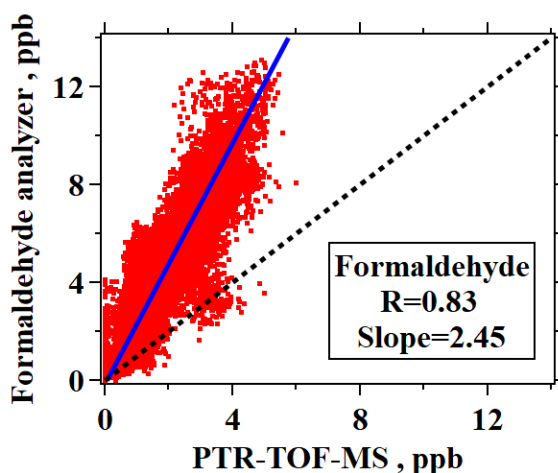

*Line 191. “3.1 Characteristics of selected VOCs” Throughout this section, I found it difficult to understand which instrument was used to produce the data discussed. For example, line 194 (“Diurnal variations of hydrocarbons”) is this NO+ PTR data or GC; line 203 (“The diurnal variation of aromatics”) is this PTR or GC data?*

Reply: We have stated in the caption of figure which instrument was used to produce the data discussed. The captions of Figure 1 and Figure 2 have been changed to:



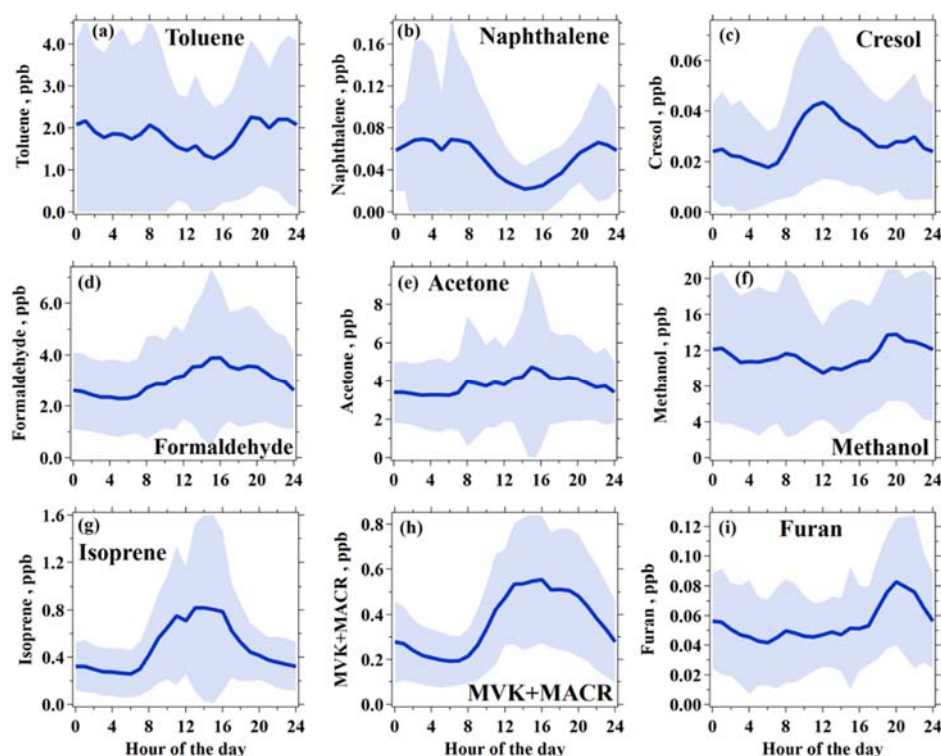

**Figure 1. Diurnal variations of selected VOCs measured by PTR-ToF-MS during the campaign. Blue lines and shaded areas represent averages and standard deviations, respectively.**

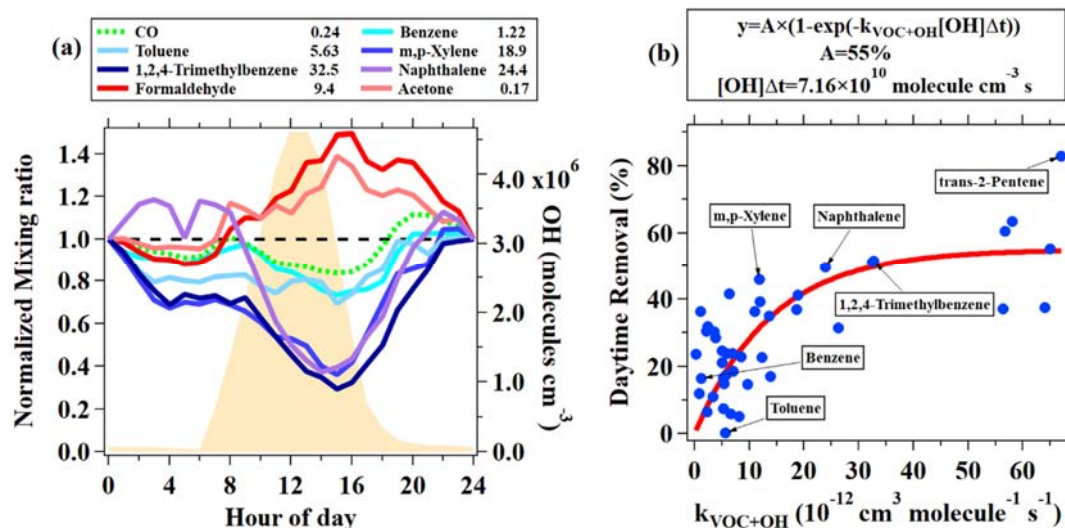

**Figure 2. (a) Normalized diurnal variations of CO, five aromatic hydrocarbons (benzene, toluene, m,p-xylene, 1,2,4-trimethylbenzene measured by GC-MS/FID and naphthalene measured by PTR-ToF-MS) and two OVOCs (formaldehyde and acetone measured by PTR-ToF-MS). The data are normalized to midnight values. The rate coefficients for the reactions with OH radicals are shown in the legend (in units of  $10^{-12} \text{ cm}^3 \text{ molecule}^{-1} \text{ s}^{-1}$ ). The orange shaded area indicates the average diurnal variation of simulated OH by an observation-constrained box model. (b)**

Daytime removal fractions of all hydrocarbons measured by GC-MS/FID and also naphthalene by PTR-ToF-MS as a function of their rate constants with OH. The daytime removal fractions for VOCs species were calculated from the concentration ratio between measurement at 14:00 and at 6:00-8:00.

*Line 215-217. “The estimated OH concentration is in good agreement with simulated average OH concentration during the same period using an observation-constrained box model” The authors should provide further description and/or reference to this model.*

Reply: We thanks the reviewer for the comment. We added the description to the box model in Section 3.1 of the revised manuscript:

**The estimated OH concentration is in good agreement with simulated average OH concentration during the same period using an observation-constrained box model ( $3.4 \times 10^6$  molecule  $\text{cm}^{-3}$ ) (Figure 2a), which is constrained using measurements of trace gases, VOCs, photolysis frequencies and meteorological parameters with Master Chemical Mechanism (MCM) v3.3.1 as the chemical mechanism (Wang et al., 2020b). The box model is run using the Framework for 0-D Atmospheric Modeling (F0AM) v3.1 (Wolfe et al., 2016).**

*Line 260. “A peak list with more than 1700 ions was used to perform high-resolution peak fittings” Please cite the software used for peak fitting.*

Reply: We have added the software used for peak fitting and the sentence is changed to:

**A peak list with more than 1700 ions was used to perform high-resolution peak fittings by Tofware (version 3.0.3; Tofwerk AG, Switzerland). More detailed description of Tofware can be found in elsewhere (Stark et al., 2015).**

*Line 268-269. “We also tried the method proposed in Sekimoto et al. (2017), but no clear relationship between calibration factors and their capture kinetic rate constants was derived.” This is a surprising result. Do the authors understand why no relationship was found?*

Reply: We re-checked the relationship between the sensitivity and rate constants for proton-transfer reactions of  $\text{H}_3\text{O}^+$  with VOCs. We found that the reason for the lack of linearity in the original manuscript: we used the thermal rate constant in the original

manuscript, while the kinetic rate constants should be used. The kinetic rate constants consider the much higher energetic collisions that is controlled by both temperature in the drift tube and also the E/N ratio (120 Td) (Cappellin et al., 2012; Sekimoto et al., 2017). After using the kinetic rate constant of each VOC, we obtained the linear relationship between the sensitivity and kinetic rate constant for proton-transfer reactions of  $\text{H}_3\text{O}^+$ , and used this linearity to re-calculate the concentration of uncalibrated species.

As discussed in section 2.2, a total of 31 VOCs species were calibrated using either gas cylinders or liquid standards. For other VOCs, we used the method proposed in Sekimoto et al. (2017) to determine the relationship between VOCs sensitivity and kinetic rate constants for proton-transfer reactions of  $\text{H}_3\text{O}^+$  with VOCs (detailed discussions in the SI). As shown in Figure 3, a clear linear relationship was obtained. The fitted line in Figure 3 is used to determine sensitivities of the uncalibrated species. Following the discussions in Sekimoto et al. (2017), uncertainties of the concentrations for uncalibrated species are around 50%.

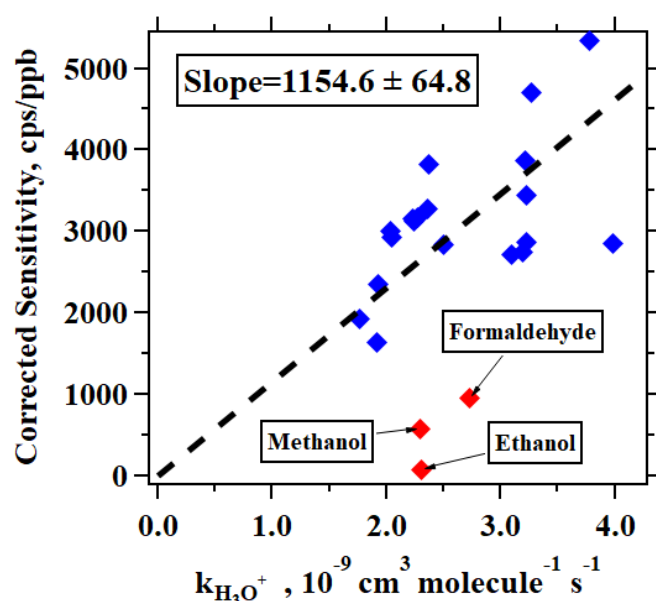

**Figure 3.** Corrected sensitivities as a function of kinetic rate constants for proton-transfer reactions of  $\text{H}_3\text{O}^+$  with VOCs. The dashed line indicates the fitted line for blue points. The red points are not used, as these compounds (formaldehyde, methanol, ethanol) are known to have lower sensitivities.

Line 270-271. “Therefore, we used the average calibration factor of 4170 cps/ppb

314 *to quantify those species without external calibration measured by PTR-ToF-MS.” The*  
315 *authors should estimate the uncertainty of the cal factor and propagate that uncer-*  
316 *tainty throughout the ensuing discussion. Also, Table S1 shows that organic acids and*  
317 *N-containing species typically had sensitivities significantly lower than 4000 cps/ppb.*  
318 *Does this imply that a single calibration factor is appropriate across all of the binned*  
319 *formulas discussed later?*

320       Reply: As shown in the response of the above comment, we re-checked the  
321 relationship between the sensitivity and kinetic rate constant for proton-transfer  
322 reactions of  $\text{H}_3\text{O}^+$ . In the revised manuscript, we obtained the linear relationship  
323 between the sensitivity and kinetic rate constant for proton-transfer reactions of  $\text{H}_3\text{O}^+$   
324 as shown in Sekimoto et al. (2017), and used this linearity to recalculate the  
325 concentration of uncalibrated species. Following the discussions in Sekimoto et al.  
326 (2017), the uncertainties of determined concentrations of uncalibrated species are  
327 around 50%. The effects of the uncertainties in concentrations of uncalibrated species  
328 are also discussed in section 3.2 and 3.4.

329       As discussed in section 2.2, a total of 31 VOCs species were calibrated using  
330 either gas cylinders or liquid standards. For other VOCs, we used the method  
331 proposed in Sekimoto et al. (2017) to determine the relationship between VOCs  
332 sensitivity and kinetic rate constants for proton-transfer reactions of  $\text{H}_3\text{O}^+$  with  
333 VOCs (detailed discussions in the SI). As shown in Figure 3, a clear linear  
334 relationship was obtained. The fitted line in Figure 3 is used to determine  
335 sensitivities of the uncalibrated species. Following the discussions in Sekimoto et  
336 al. (2017), uncertainties of the concentrations for uncalibrated species are around  
337 50%.

338       Adding up these contributions, it significantly narrows the gap between the  
339 measured and calculated OH reactivity, leaving only 11% of OH reactivity as  
340 “missing” during the campaign. Considering the large uncertainties for both  
341 concentrations (~50%) and rate constants of the uncalibrated species (on the order  
342 of 100%), the missing reactivity can range in 0%-19%. Nevertheless, the  
343 determined missing reactivity would be well below the estimated uncertainty (20%)  
344 for the OH reactivity measurements by the CRM method, indicating that gap  
345 between measured and calculated reactivity can be significantly narrowed after  
346 taking into account all of the species by PTR-ToF-MS.

Line 273-274 “We divided the VOCs measured by PTR-ToF-MS into groups according to the oxygen atoms in the formula” This analysis assumes that fragmentation and clustering are insignificant contributors to the mass spectra of ambient air. As noted above, the authors should defend this assumption and/or provide some measure of the uncertainty of their assumption.

Reply: We have added evidence of this assumption in the revised manuscript. The figure below shows the PTR-ToF-MS mass spectra from measurements of zero air and diluted gas standard with 5 ppb of various VOCs from a 16-component VOC gas standard (Apel Riemer Environmental Inc.). It can be seen that the fragmentation of most VOCs product ions is not significant, except monoterpene and ethanol, which are known to fragment significantly in PTR-MS. We included this graph in the SI of the revised manuscript.

At this condition, the fractions of water-cluster ions are small, and the fragmentation of most VOCs product ions is not significant (Figure S3) (de Gouw and Warneke, 2007; Yuan et al., 2017).

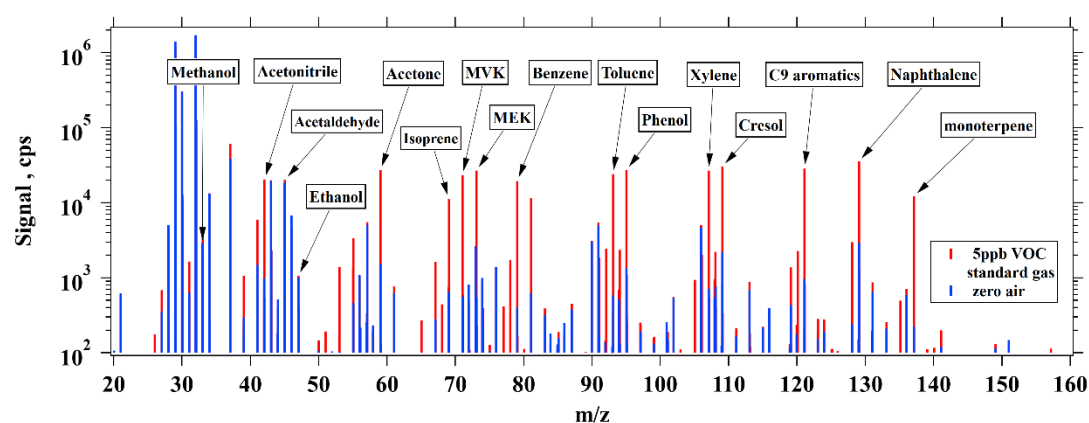

**Figure S3. The mass spectra from measurements of zero air and diluted gas standard with 5 ppb of various VOCs from a 16-component VOC gas standard.**

Line 284 “The low contributions from OVOCs with three or more oxygen atoms are different from the concurrent observations of iodide ToF-CIMS during the campaign” This is the only mention of the I<sup>2</sup>A<sup>+</sup> CIMS instrument that I can find in the manuscript. The authors should provide some description of this instrument in Section 2, especially the inlet used by the I-CIMS as that would be relevant to the discussion here. The language in this comparison of relative abundance of more-highly oxidized OVOCs implies that the PTR method is less sensitive to these species due to losses. The authors should also consider that the I-CIMS technique is relatively

insensitive to less oxidized OVOCs.

Reply: This description are added in the Section 2 of the revised manuscript.

**An iodide-adduct time-of-flight chemical ionization mass spectrometer (ToF-CIMS) (Aerodyne Research, Inc.) coupled with a Filter Inlet for Gases and Aerosols (FIGAERO) inlet was used for measuring oxygenated VOCs in ambient air (Wang et al., 2020b). The Filter Inlet for Gases and Aerosols (FIGAERO) sampling assembly switches the air flow between two inlets, one designed for gases and the other for chemicals thermally desorbed from aerosols, which provides the online measurements of species from both gas-phase and particle-phase (Thornton et al., 2020;Lopez-Hilfiker et al., 2014).**

*Line 308-309. “If only considering the six common OVOCs measured by PTR-MS, i.e. formaldehyde, acetaldehyde, methanol, acetone, MEK and MVK+MACR”. Where do the authors get this list of OVOCs? They should cite the reference, or the survey of references used for this.*

Reply: Thanks for the valuable suggestion. We have added the corresponding references in the revised manuscript:

**If only considering the six common OVOCs measured by PTR-MS, i.e. formaldehyde, acetaldehyde, methanol, acetone, MEK and MVK+MACR (de Gouw et al., 2003;de Gouw and Warneke, 2007), the OVOCs fraction in total VOCs would be only 39%.**

*Line 313. Source analysis of OVOCs. This section describes an analysis method that attributes OVOC sources to primary anthropogenic, secondary formation, biogenic and background. An implicit assumption here is that a single anthropogenic tracer (acetylene or CO) can characterize all primary anthropogenic emissions. That is, primary anthro emissions are homogeneous for the sampling site. The authors should state this in the text.*

Reply: Thank you for pointing this out. CO and acetylene has proven to be a good tracer for urban emissions, and many literature studies have reported the use of CO and acetylene as anthropogenic tracers in urban (de Gouw et al., 2008;Yuan et al., 2012b), so we use acetylene or CO as a anthropogenic tracer, and we have already stated this in Section 3.3: The photochemical age-based parameterization method for source analysis of OVOCs is based on the following assumptions: (1) the amount of each OVOCs



emitted is proportional to an inert tracer (e.g. CO and acetylene C<sub>2</sub>H<sub>2</sub>) (Yuan et al., 2012b; de Gouw et al., 2005);

*Line 377-378. “An effective OH rate constant of  $2 \times 10^{-11}$  cm<sup>3</sup> molecule<sup>-1</sup> s<sup>-1</sup> was applied for different ion groups.” It is not clear how this value was determined to be appropriate. Please provide some rationale for using this value.*

Reply: The OH rate constants are needed for the source analysis of different OVOCs ion groups. However, this parameter is not possible to obtain, unless the OH rate constants for each ion is known. To approximate the effective OH rate constant, we calculate the median ( $2.0 \times 10^{-11}$  cm<sup>3</sup> molecule<sup>-1</sup> s<sup>-1</sup>) for the OH rate constants for all OVOCs ions that are listed in Table S4 in the revised manuscript. As the result, we use  $2.0 \times 10^{-11}$  cm<sup>3</sup> molecule<sup>-1</sup> s<sup>-1</sup> as the best estimate for the effective OH rate constant for OVOCs ion groups.

We included this information in the revised manuscript:

**An effective OH rate constant of  $2.0 \times 10^{-11}$  cm<sup>3</sup> molecule<sup>-1</sup> s<sup>-1</sup> (the median for all OVOCs ions in Table S4) was applied for different ion groups.**

*Line 394. “VOCs reactivity can visually and effectively characterize” It’s not clear what the authors mean by “visually” here.*

Reply: This sentence is changed in the revised manuscript:

**VOCs reactivity can effectively characterize the contributions of various VOCs to atmospheric chemical reactions that are related to the formation of secondary pollutants.**

*Line 809. Figure 2. This appears to be GC data, based upon the species shown (e.g. isomers). The authors should state explicitly if this is the case. Also, In Figure 2b, the labeling of some dots in the figure seems arbitrary. Consider limiting labels to those species discussed in the main text or significant outliers, e.g. the point in the top right corner, which seems a significant, and perhaps interesting, outlier to the overall good fit of the data.*

Reply: Thanks for the suggestion. In Figure 2 a, benzene, toluene, m,p-xylene and 1,2,4-trimethylbenzene are measured by GC-MS/FID, and naphthalene, formaldehyde and acetone are measured by PTR-ToF-MS, which has been illustrated in the caption of Figure 2a. Following the suggestion from the reviewer, the species shown in Figure

2a and significant outliers are marked as labels in Figure 2b.

The caption of Figure 2 has been changed to:

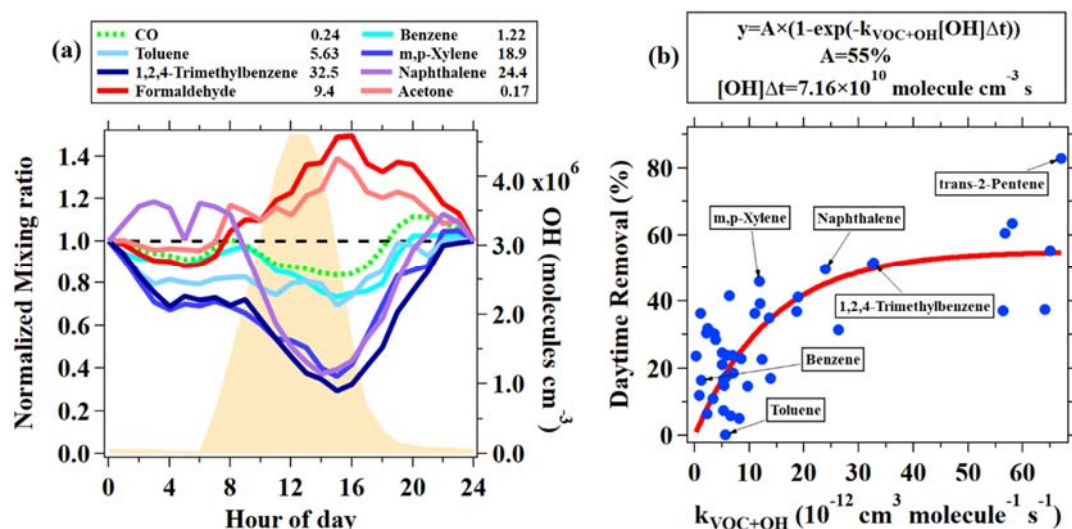

**Figure 2. (a) Normalized diurnal variations of CO, five aromatic hydrocarbons (benzene, toluene, m,p-xylene, 1,2,4-trimethylbenzene measured by GC-MS/FID and naphthalene measured by PTR-ToF-MS) and two OVOCs (formaldehyde and acetone measured by PTR-ToF-MS). The data are normalized to midnight values. The rate coefficients for the reactions with OH radicals are shown in the legend (in units of  $10^{-12} \text{ cm}^3 \text{ molecule}^{-1} \text{ s}^{-1}$ ). The orange shaded area indicates the average diurnal variation of simulated OH by an observation-constrained box model. (b) Daytime removal fractions of all hydrocarbons measured by GC-MS/FID and also naphthalene by PTR-ToF-MS as a function of their rate constants with OH. The daytime removal fractions for VOCs species were calculated from the concentration ratio between measurement at 14:00 and at 6:00-8:00.**

Line 820. Figure 3. I found this figure difficult to interpret as the colors are similar and the figure is highly detailed. My suggestion: could the authors reformat as a stacked-axis plot, with the five categories of ions on their own y-axis?

Reply: We thank the reviewer for the comment. Figure 3 shows the average mass spectra measured by PTR-ToF-MS during the campaign. Here, we divide the ions in the mass spectra into five different ion categories, following the procedures in many previous online mass spectrometry studies (Koss et al., 2017; Stockwell et al., 2015; Zhang et al., 2018). We tried to modify the graph according to the suggestion from the reviewer by placing five categories of ions on their own y-axis and reformatted as a stacked axis plot. However, we found the concentration from different categories



cannot be compared easily. As the result, we decide to keep plotting the graph this way. Nevertheless, we made the graph taller, which should be easier to read sticks in the graph.

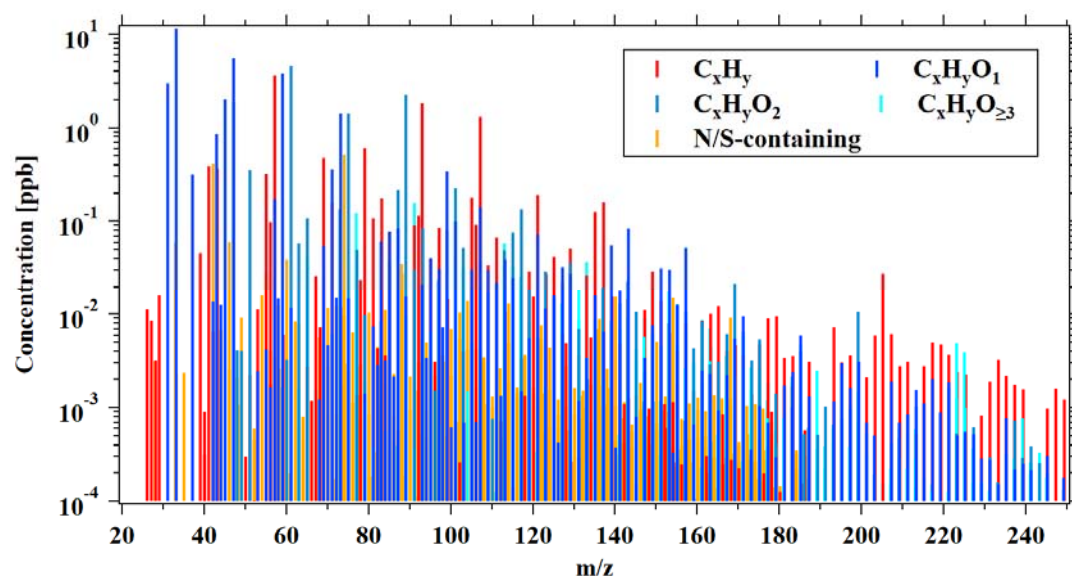

**Figure 3. Average mass spectra obtained by PTR-ToF-MS from ambient measurement during the campaign. The different ion categories are detailedly discussed in the text.**

Line 823. Figure 4. The pie charts in (a) and (c) don't seem to match the diurnal trends in (b) and (d), respectively. The mixing ratios shown in (b) and (d) would imply different sizes of the wedges that make up each pie chart than are shown. Perhaps I am mis-interpreting what is presented? Supplement, Table S4. I found this table to be especially problematic, as the authors provide an enormous list of ions with associated OH reactivities. Since the authors never attribute a parent molecule to these ions, this makes these attributions impossible to evaluate. For comparison, Koss et al. (2018) provides a similar table in their supplemental materials, but also provides a master table that links each ion with a suspected or confirmed parent. The authors should revise this table to give a suspected / confirmed parent in each case.

Reply: We thank the reviewer for the comment. In order to demonstrate the diurnal variations of different categories of VOCs clearly on the same y-axis in Figure 4b and 4d, concentrations of some categories are plotted by multiplying scale factors, which are explicitly indicated in the figure legend. For example, OVOC concentrations shown in Figure 4d are the results of multiplying a factor of 0.1 of the measured concentrations.

In terms of Table S4, we added our attributions of the most possible compounds

492 to the ions, based on previous review and studies (Yuan et al., 2017;Koss et al., 2018).  
493 Table S4 in SI has been changed to:

494 **Table S4. The average concentrations of VOCs measured by PTR-ToF-MS and their OH rate constants, which were used for calculating**  
 495 **OH reactivity.**

| Ion exact mass (Th) | Ion formula                      | Compound                 | Average concentration (ppb) | OH rate constant ( $10^{-12} \text{ cm}^3 \text{ molecule}^{-1} \text{ s}^{-1}$ ) | Source of OH rate constants |
|---------------------|----------------------------------|--------------------------|-----------------------------|-----------------------------------------------------------------------------------|-----------------------------|
| <b>Common OVOCs</b> |                                  |                          |                             |                                                                                   |                             |
| 30.0178             | CH <sub>2</sub> O                | Formaldehyde             | 2.991±2.059                 | 9.4                                                                               | Atkinson 2003 <sup>21</sup> |
| 32.0335             | CH <sub>4</sub> O                | Methanol                 | 11.43±7.612                 | 0.8                                                                               | Atkinson 2003               |
| 44.0335             | C <sub>2</sub> H <sub>4</sub> O  | Acetaldehyde             | 2.027±1.292                 | 15.0                                                                              | Atkinson 2003               |
| 56.0335             | C <sub>3</sub> H <sub>4</sub> O  | Acrolein                 | 0.173±0.102                 | 20.0                                                                              | Gilman 2015                 |
| 58.0491             | C <sub>3</sub> H <sub>6</sub> O  | Acetone                  | 3.798±2.508                 | 0.2                                                                               | Atkinson 2003               |
| 70.0491             | C <sub>4</sub> H <sub>6</sub> O  | MVK+MACR                 | 0.362±0.249                 | 24.8                                                                              | Koss 2018 <sup>32</sup>     |
| 72.0648             | C <sub>4</sub> H <sub>8</sub> O  | MEK                      | 1.420±1.309                 | 5.5                                                                               | Koss 2018                   |
| 86.0804             | C <sub>5</sub> H <sub>10</sub> O | Pentanones               | 0.085±0.049                 | 7.9                                                                               | Atkinson 2003               |
| 100.096             | C <sub>6</sub> H <sub>12</sub> O | Hexanones                | 0.101±0.091                 | 18.6                                                                              | Koss 2018                   |
| <b>NMHCs</b>        |                                  |                          |                             |                                                                                   |                             |
| 184.36              | C <sub>13</sub> H <sub>28</sub>  | Tridecane <sup>#</sup>   | 0.066±0.060                 | 15.3                                                                              | Atkinson 2003               |
| 198.39              | C <sub>14</sub> H <sub>30</sub>  | Tetradecane <sup>#</sup> | 0.050±0.047                 | 16.7                                                                              | Atkinson 2003               |
| 212.41              | C <sub>15</sub> H <sub>32</sub>  | Pentadecane <sup>#</sup> | 0.045±0.042                 | 18.1                                                                              | Atkinson 2003               |
| 226.44              | C <sub>16</sub> H <sub>34</sub>  | Hexadecane <sup>#</sup>  | 0.036±0.033                 | 19.4                                                                              | Atkinson 2003               |
| 240.46              | C <sub>17</sub> H <sub>36</sub>  | Heptadecane <sup>#</sup> | 0.021±0.020                 | 20.7                                                                              | Atkinson 2003               |
| 254.49              | C <sub>18</sub> H <sub>38</sub>  | Octadecane <sup>#</sup>  | 0.013±0.014                 | 21.9                                                                              | Atkinson 2003               |

|         |                                 |                         |              |       |                   |
|---------|---------------------------------|-------------------------|--------------|-------|-------------------|
| 268.52  | C <sub>19</sub> H <sub>40</sub> | Nonadecane <sup>#</sup> | 0.005±0.009  | 23    | Atkinson 2003     |
| 282.54  | C <sub>20</sub> H <sub>42</sub> | Eicosane <sup>#</sup>   | 0.0007±0.004 | 24    | Atkinson 2003     |
| 40.038  | C <sub>3</sub> H <sub>4</sub>   | 1,2-Propadiene          | 0.758±0.971  | 0.695 | Pfannerstill 2019 |
| 66.054  | C <sub>5</sub> H <sub>6</sub>   | Cyclopentadiene         | 0.038±0.029  | 92.0  | Gilman 2015       |
| 82.085  | C <sub>6</sub> H <sub>10</sub>  | Methylcyclopentane      | 0.225±0.158  | 6.97  | Atkinson 2003     |
| 84.101  | C <sub>6</sub> H <sub>12</sub>  | Hexene isomers          | 0.098±0.078  | 37    | Atkinson 2003     |
| 94.085  | C <sub>7</sub> H <sub>10</sub>  | Terpene fragment        | 0.047±0.041  | 46.8  | Pfannerstill 2019 |
| 96.101  | C <sub>7</sub> H <sub>12</sub>  | C7 cycloalkanes         | 0.103±0.073  | 9.64  | Atkinson 2003     |
| 102.054 | C <sub>8</sub> H <sub>6</sub>   | Phenylacetylene         | 0.005±0.004  | 1.0   | Gilman 2015       |
| 108.101 | C <sub>8</sub> H <sub>12</sub>  | Terpene fragment        | 0.036±0.041  | 107   | Pfannerstill 2019 |
| 110.116 | C <sub>8</sub> H <sub>14</sub>  | C8 cycloalkanes         | 0.075±0.055  | 9.64  | Atkinson 2003     |
| 116.07  | C <sub>9</sub> H <sub>8</sub>   | Indene                  | 0.004±0.009  | 78.0  | Atkinson 2003     |
| 118.086 | C <sub>9</sub> H <sub>10</sub>  | Indane                  | 0.032±0.031  | 50.4  | Atkinson 2003     |
| 128.07  | C <sub>10</sub> H <sub>8</sub>  | Naphthalene             | 0.052±0.061  | 23.0  | Atkinson 2003     |
| 130.086 | C <sub>10</sub> H <sub>10</sub> | Methyl indene           | 0.004±0.005  | 28.5  | Koss 2018         |
| 132.101 | C <sub>10</sub> H <sub>12</sub> | Tetrahydronaphthalene   | 0.028±0.026  | 33.0  | Koss 2018         |
| 134.117 | C <sub>10</sub> H <sub>14</sub> | C10 aromatics           | 0.133±0.141  | 9.5   | Koss 2018         |
| 136.132 | C <sub>10</sub> H <sub>16</sub> | Monoterpenes            | 0.161±0.245  | 162.8 | Koss 2018         |
| 142.086 | C <sub>11</sub> H <sub>10</sub> | Methyl naphthalene      | 0.015±0.017  | 50.0  | Koss 2018         |
| 144.101 | C <sub>11</sub> H <sub>12</sub> | C11 6-DBE               | 0.001±0.003  | 78.0  | Koss 2018         |
| 146.116 | C <sub>11</sub> H <sub>14</sub> | aromatic fragment       | 0.011±0.015  | 58    | Pfannerstill 2019 |
| 148.132 | C <sub>11</sub> H <sub>16</sub> | C11 aromatics           | 0.030±0.031  | 50.0  | Koss 2018         |

|             |                                              |                           |             |       |                           |
|-------------|----------------------------------------------|---------------------------|-------------|-------|---------------------------|
| 152.07      | C <sub>12</sub> H <sub>8</sub>               | Acenaphthylene            | 0.001±0.003 | 15.1  | Koss 2018                 |
| 156.101     | C <sub>12</sub> H <sub>12</sub>              | C2 naphthalene            | 0.008±0.009 | 60.0  | Koss 2018                 |
| 160.132     | C <sub>12</sub> H <sub>16</sub>              | aromatic fragment         | 0.009±0.012 | 58    | Pfannerstill 2019         |
| 162.148     | C <sub>12</sub> H <sub>18</sub>              | C12 aromatics             | 0.010±0.010 | 113.0 | Koss 2018                 |
| 174.148     | C <sub>13</sub> H <sub>18</sub>              | C13 5-DBE                 | 0.005±0.008 | 38.5  | Pfannerstill 2019         |
| 176.164     | C <sub>13</sub> H <sub>20</sub>              | C13 aromatics             | 0.009±0.010 | 113.0 | Koss 2018                 |
| Novel OVOCs |                                              |                           |             |       |                           |
| 46.0128     | CH <sub>2</sub> O <sub>2</sub>               | Formic acid               | 1.880±3.155 | 0.4   | Koss 2018                 |
| 46.0491     | C <sub>2</sub> H <sub>6</sub> O              | Ethanol                   | 5.634±5.192 | 3.2   | Atkinson 2003             |
| 48.0284     | CH <sub>4</sub> O <sub>2</sub>               | Methane diol              | 0.005±0.003 | 7.0   | Koss 2018                 |
| 54.0178     | C <sub>3</sub> H <sub>2</sub> O              | Propynal                  | 0.005±0.057 | 20.0  | Koss 2018                 |
| 58.0128     | C <sub>2</sub> H <sub>2</sub> O <sub>2</sub> | Glyoxal                   | 0.001±0.002 | 11.0  | Atkinson 2003             |
| 60.0284     | C <sub>2</sub> H <sub>4</sub> O <sub>2</sub> | Acetic acid               | 4.618±4.681 | 3.7   | Koss 2018                 |
| 62.044      | C <sub>2</sub> H <sub>6</sub> O <sub>2</sub> | Ethane diol               | 0.070±0.068 | 14.5  | Pfannerstill 2019         |
| 64.023      | CH <sub>4</sub> O <sub>3</sub>               | formic acid water cluster | 0.039±0.048 | 7.1   | Pfannerstill 2019         |
| 68.0335     | C <sub>4</sub> H <sub>4</sub> O              | Furan                     | 0.055±0.036 | 40.0  | Gilman 2015               |
| 70.0128     | C <sub>3</sub> H <sub>2</sub> O <sub>2</sub> | Propiolic acid            | 0.008±0.010 | 26.0  | Koss 2018                 |
| 72.0284     | C <sub>3</sub> H <sub>4</sub> O <sub>2</sub> | Methyl glyoxal            | 0.143±0.093 | 21.1  | Koss 2018                 |
| 74.0441     | C <sub>3</sub> H <sub>6</sub> O <sub>2</sub> | Propanoic acid            | 1.438±2.188 | 2.2   | Koss 2018                 |
| 76.059      | C <sub>3</sub> H <sub>8</sub> O <sub>2</sub> | Propane diols             | 0.053±0.046 | 16.2  | Pfannerstill 2019         |
| 80.0335     | C <sub>5</sub> H <sub>4</sub> O              | Cyclopentadiene ketone    | 0.006±0.005 | 20.0  | Gilman 2015 2-methylfuran |

|          |                                               |                         |             |       |                              |
|----------|-----------------------------------------------|-------------------------|-------------|-------|------------------------------|
| 82.0491  | C <sub>5</sub> H <sub>6</sub> O               | Methyl furan            | 0.081±0.063 | 37.1  | Gilman 2015 cyclopentenone   |
| 84.0284  | C <sub>4</sub> H <sub>4</sub> O <sub>2</sub>  | Furanone                | 0.036±0.025 | 44.5  | Gilman 2015                  |
| 84.0648  | C <sub>5</sub> H <sub>8</sub> O               | C5 ketones              | 0.060±0.043 | 11.5  | Atkinson 2003, NIST Database |
| 86.0441  | C <sub>4</sub> H <sub>6</sub> O <sub>2</sub>  | 2,3-Butanedione         | ±           | 0.8   | Gilman 2015, NIST Database   |
| 88.0233  | C <sub>3</sub> H <sub>4</sub> O <sub>3</sub>  | Pyruvic acid            | 0.009±0.026 | 0.1   | Gilman 2015                  |
| 88.0597  | C <sub>4</sub> H <sub>8</sub> O <sub>2</sub>  | Methyl propanoate       | 2.273±2.367 | 0.9   | Koss 2018                    |
| 94.0491  | C <sub>6</sub> H <sub>6</sub> O               | Phenol                  | 0.039±0.030 | 28.0  | Gilman 2015                  |
| 96.0284  | C <sub>5</sub> H <sub>4</sub> O <sub>2</sub>  | Furfural                | 0.023±0.020 | 35.6  | Gilman 2015                  |
| 96.0648  | C <sub>6</sub> H <sub>8</sub> O               | Dimethyl or ethyl furan | 0.039±0.025 | 132.0 | Gilman 2015 25dimethylfuran  |
| 98.0441  | C <sub>5</sub> H <sub>6</sub> O <sub>2</sub>  | Methyl furanone         | 0.050±0.033 | 13.6  | Koss 2018                    |
| 98.0804  | C <sub>6</sub> H <sub>10</sub> O              | Hexenones               | 0.262±0.278 | 6.4   | Atkinson 2003 cyclohexanone  |
| 100.023  | C <sub>4</sub> H <sub>4</sub> O <sub>3</sub>  | Dihydro furandione      | 0.040±0.062 | 20.0  | Koss 2018                    |
| 100.06   | C <sub>5</sub> H <sub>8</sub> O <sub>2</sub>  | Methyl methacrylate     | 0.248±0.163 | 30.3  | Gilman 2015                  |
| 102.039  | C <sub>4</sub> H <sub>6</sub> O <sub>3</sub>  | Acetic anhydride        | 0.026±0.020 | 43.0  | Koss 2018                    |
| 102.0753 | C <sub>5</sub> H <sub>10</sub> O <sub>2</sub> | Pentanoic acids         | 0.058±0.055 | 8.71  | Pfannerstill 2019            |
| 106.049  | C <sub>7</sub> H <sub>6</sub> O               | Benzaldehyde            | 0.104±0.099 | 12.0  | Atkinson 2003                |
| 108.028  | C <sub>6</sub> H <sub>4</sub> O <sub>2</sub>  | Benzoquinone            | 0.016±0.015 | 4.6   | NIST Database                |
| 108.065  | C <sub>7</sub> H <sub>8</sub> O               | Cresols                 | 0.028±0.023 | 26.2  | NIST Database                |
| 110.044  | C <sub>6</sub> H <sub>6</sub> O <sub>2</sub>  | Methyl furfural         | 0.022±0.017 | 80.1  | Koss 2018                    |
| 110.08   | C <sub>7</sub> H <sub>10</sub> O              | C3 furan                | 0.026±0.017 | 23.3  | Koss 2018                    |
| 112.023  | C <sub>5</sub> H <sub>4</sub> O <sub>3</sub>  | Methylfurandione        | 0.052±0.049 | 49.0  | Koss 2018                    |
| 112.06   | C <sub>6</sub> H <sub>8</sub> O <sub>2</sub>  | Dimethylfuranone        | 0.043±0.031 | 57.0  | Koss 2018                    |

|         |                                               |                                |             |       |                                     |
|---------|-----------------------------------------------|--------------------------------|-------------|-------|-------------------------------------|
| 112.096 | C <sub>7</sub> H <sub>12</sub> O              | Ethyl cyclopentanone           | 0.029±0.028 | 10.0  | NIST Database cycloheptanone        |
| 114.039 | C <sub>5</sub> H <sub>6</sub> O <sub>3</sub>  | C5 3-oxy 3DBE                  | 0.029±0.024 | 100.0 | Koss 2018                           |
| 114.075 | C <sub>6</sub> H <sub>10</sub> O <sub>2</sub> | C6 diketone isomers            | 0.075±0.057 | 20.0  | Koss 2018                           |
| 114.112 | C <sub>7</sub> H <sub>14</sub> O              | heptanal                       | 0.019±0.013 | 21.4  | Atkinson 2003                       |
| 116.055 | C <sub>5</sub> H <sub>8</sub> O <sub>3</sub>  | C5 3-oxy 2-DBE isomers         | 0.022±0.017 | 5.0   | Koss 2018                           |
| 116.091 | C <sub>6</sub> H <sub>12</sub> O <sub>2</sub> | Butyl ester acetic acid        | 0.135±0.136 | 6.0   | NIST Database                       |
| 118.049 | C <sub>8</sub> H <sub>6</sub> O               | Benzofuran                     | 0.006±0.007 | 37.0  | NIST Database                       |
| 120.065 | C <sub>8</sub> H <sub>8</sub> O               | Tolualdehyde                   | 0.056±0.044 | 16.0  | Atkinson 2003 average tolualdehydes |
| 122.044 | C <sub>7</sub> H <sub>6</sub> O <sub>2</sub>  | Salicylaldehyde                | 0.022±0.023 | 38.0  | Koss 2018                           |
| 122.08  | C <sub>8</sub> H <sub>10</sub> O              | Ethylphenol                    | 0.012±0.012 | 46.6  | Koss 2018                           |
| 124.023 | C <sub>6</sub> H <sub>4</sub> O <sub>3</sub>  | Hydroxy benzoquinone           | 0.002±0.002 | 4.6   | Koss 2018                           |
| 124.06  | C <sub>7</sub> H <sub>8</sub> O <sub>2</sub>  | guaiacol                       | 0.014±0.011 | 75.0  | NIST Database                       |
| 124.096 | C <sub>8</sub> H <sub>12</sub> O              | C4 furan                       | 0.018±0.010 | 40.4  | Pfannerstill 2019                   |
| 126.039 | C <sub>6</sub> H <sub>6</sub> O <sub>3</sub>  | Hydroxymethyl furfural         | 0.012±0.009 | 100.0 | Koss 2018                           |
| 126.111 | C <sub>8</sub> H <sub>14</sub> O              | Cyclooctanone                  | 0.024±0.027 | 98.8  | Pfannerstill 2019                   |
| 128.055 | C <sub>6</sub> H <sub>8</sub> O <sub>3</sub>  | Methyl hydroxy dihydrofurfural | 0.023±0.019 | 132.0 | Koss 2018                           |
| 128.127 | C <sub>8</sub> H <sub>16</sub> O              | Octanal                        | 0.021±0.015 | 11    | Pfannerstill 2019                   |
| 132.065 | C <sub>9</sub> H <sub>8</sub> O               | Methyl benzofurans             | 0.004±0.005 | 37.0  | Gilman 2015                         |
| 134.08  | C <sub>9</sub> H <sub>10</sub> O              | 3-methylacetophenone           | 0.012±0.010 | 4.5   | NIST Database                       |
| 136.06  | C <sub>8</sub> H <sub>8</sub> O <sub>2</sub>  | Methyl benzoic acid            | 0.019±0.018 | 12.0  | Koss 2018                           |

|                        |                                                |                                |             |       |                                                 |
|------------------------|------------------------------------------------|--------------------------------|-------------|-------|-------------------------------------------------|
| 138.075                | C <sub>8</sub> H <sub>10</sub> O <sub>2</sub>  | Creosol                        | 0.008±0.007 | 100.0 | NIST Database                                   |
| 140.127                | C <sub>9</sub> H <sub>16</sub> O               | C9 carbonyl +1DBE              | 0.014±0.010 | 43.5  | Pfannerstill 2019                               |
| 144.05                 | C <sub>6</sub> H <sub>8</sub> O <sub>4</sub>   | C6 diacid +1DBE                | 0.004±0.003 | 4.6   | Koss 2018                                       |
| 144.065                | C <sub>10</sub> H <sub>8</sub> O               | Ethenyl benzofuran             | 0.001±0.002 | 37.0  | Koss 2018                                       |
| 146.08                 | C <sub>10</sub> H <sub>10</sub> O              | Dimethylbenzofuran             | 0.004±0.004 | 37.0  | Koss 2018                                       |
| 148.096                | C <sub>10</sub> H <sub>12</sub> O              | Methyl chavicol<br>(estragole) | 0.008±0.007 | 50.0  | NIST Database: 1-methoxy-4-(2-propenyl) benzene |
| 150.075                | C <sub>9</sub> H <sub>10</sub> O <sub>2</sub>  | Vinyl guaiacol                 | 0.004±0.004 | 100.0 | Koss 2018                                       |
| 152.055                | C <sub>8</sub> H <sub>8</sub> O <sub>3</sub>   | Vanillin                       | 0.016±0.010 | 85.0  | Koss 2018                                       |
| 152.127                | C <sub>10</sub> H <sub>16</sub> O              | Camphor                        | 0.028±0.018 | 4.3   | Atkinson 2003                                   |
| 154.07                 | C <sub>8</sub> H <sub>10</sub> O <sub>3</sub>  | Syringol                       | 0.004±0.004 | 100.0 | Koss 2018                                       |
| 154.143                | C <sub>10</sub> H <sub>18</sub> O              | Linalool                       | 0.012±0.009 | 25.0  | NIST Database Fenchol, Borneol                  |
| 156.159                | C <sub>10</sub> H <sub>20</sub> O              | Decanal                        | 0.051±0.066 | 13.0  | Atkinson 2003 2-decanone                        |
| 164.091                | C <sub>10</sub> H <sub>12</sub> O <sub>2</sub> | Eugenol                        | 0.003±0.003 | 100.0 | Koss 2018                                       |
| N/S-containing species |                                                |                                |             |       |                                                 |
| 27.0182                | HCN                                            | HCN                            | 0.003±0.002 | 0.0   | Cicerone 1983                                   |
| 33.995                 | H <sub>2</sub> S                               | Hydrogen sulfide               | 0.005±0.004 | 4.6   | NIST database                                   |
| 41.0338                | C <sub>2</sub> H <sub>3</sub> N                | Acetonitrile                   | 0.412±2.258 | 0.02  | Gilman 2015                                     |
| 43.0495                | C <sub>2</sub> H <sub>5</sub> N                | Etheneamine                    | 0.010±0.011 | 0.2   | Koss 2018                                       |
| 45.0287                | CH <sub>3</sub> NO                             | Formamide                      | 0.046±0.092 | 1.5   | NIST database: CH <sub>2</sub> =NOH             |
| 45.0651                | C <sub>2</sub> H <sub>7</sub> N                | Ethylamine                     | 0.004±0.007 | 45.5  | Koss 2018                                       |
| 48.0106                | CH <sub>4</sub> S                              | Methane thiol                  | 0.012±0.014 | 33.0  | NIST database                                   |
| 53.0338                | C <sub>3</sub> H <sub>3</sub> N                | Acrylonitrile                  | 0.011±0.007 | 4.0   | Gilman 2015                                     |



|         |                                               |                      |             |       |                                          |
|---------|-----------------------------------------------|----------------------|-------------|-------|------------------------------------------|
| 55.0495 | C <sub>3</sub> H <sub>5</sub> N               | Propane nitrile      | 0.003±0.004 | 0.3   | Gilman 2015                              |
| 57.0287 | C <sub>2</sub> H <sub>3</sub> NO              | Methyl isocyanate    | 0.011±0.007 | 0.1   | Koss 2018                                |
| 57.0651 | C <sub>3</sub> H <sub>7</sub> N               | Propene amine        | 0.004±0.005 | 15.0  | Koss 2018                                |
| 59.0444 | C <sub>2</sub> H <sub>5</sub> NO              | Acetamide            | 0.029±0.055 | 8.6   | NIST database                            |
| 61.0237 | CH <sub>3</sub> NO <sub>2</sub>               | Nitromethane         | 0.006±0.006 | 0.3   | Gilman 2015                              |
| 62.0263 | C <sub>2</sub> H <sub>6</sub> S               | Dimethyl sulfide     | 0.010±0.012 | 6.0   | NIST database                            |
| 65.0338 | C <sub>4</sub> H <sub>3</sub> N               | Cyanoallene isomers  | 0.001±0.007 | 4.0   | Koss 2018                                |
| 67.0495 | C <sub>4</sub> H <sub>5</sub> N               | Pyrrole              | 0.006±0.007 | 111.4 | Gilman 2015                              |
| 69.0651 | C <sub>4</sub> H <sub>7</sub> N               | Dihydropyrrole       | 0.008±0.004 | 7.7   | Koss 2018                                |
| 71.0808 | C <sub>4</sub> H <sub>9</sub> N               | Butene amines        | 0.001±0.001 | 25.0  | Koss 2018                                |
| 73.0237 | C <sub>2</sub> H <sub>3</sub> NO <sub>2</sub> | Nitroethene          | 0.001±0.007 | 1.2   | NIST Database                            |
| 73.06   | C <sub>3</sub> H <sub>7</sub> NO              | C3 amides            | 0.350±0.616 | 12.5  | Pfannerstill 2019                        |
| 75.0393 | C <sub>2</sub> H <sub>5</sub> NO <sub>2</sub> | Nitroethane          | 0.005±0.004 | 0.1   | NIST Database                            |
| 77.0008 | CH <sub>3</sub> NOS                           | Sulfinyl methanamine | 0.001±0.001 | 0.2   | Koss 2018                                |
| 79.0495 | C <sub>5</sub> H <sub>5</sub> N               | Pyridine             | 0.010±0.006 | 5.6   | Koss 2018                                |
| 81.0651 | C <sub>5</sub> H <sub>7</sub> N               | Methyl pyrrole       | 0.004±0.006 | 62.7  | Gilman 2015                              |
| 83.0808 | C <sub>5</sub> H <sub>9</sub> N               | C5 nitrile           | 0.007±0.003 | 0.5   | Koss 2018                                |
| 89.055  | C <sub>3</sub> H <sub>7</sub> NO <sub>2</sub> | Nitropropanes        | 0.001±0.002 | 1.2   | NIST Database                            |
| 93.0287 | C <sub>5</sub> H <sub>3</sub> NO              | 2-furancarbonitrile  | 0.000±0.001 | 40.0  | Koss 2018                                |
| 93.0651 | C <sub>6</sub> H <sub>7</sub> N               | 2-methyl pyridine    | 0.006±0.005 | 2.6   | NIST Database methylpyridines<br>average |
| 93.9984 | C <sub>2</sub> H <sub>6</sub> S <sub>2</sub>  | Dimethyl disulfide   | 0.004±0.005 | 230.0 | NIST Database                            |

|         |                                               |                                     |             |       |                   |
|---------|-----------------------------------------------|-------------------------------------|-------------|-------|-------------------|
| 95.0444 | C <sub>5</sub> H <sub>5</sub> NO              | 4-Pyridinol                         | 0.001±0.001 | 0.5   | Koss 2018         |
| 95.0808 | C <sub>6</sub> H <sub>9</sub> N               | 1-ethyl pyrrole                     | 0.001±0.001 | 145.0 | Koss 2018         |
| 97.0964 | C <sub>6</sub> H <sub>11</sub> N              | 4-methylpentanenitrile              | 0.002±0.001 | 5.0   | Koss 2018         |
| 103.049 | C <sub>7</sub> H <sub>5</sub> N               | Benzonitrile                        | 0.008±0.006 | 1.0   | Gilman 2015       |
| 105.065 | C <sub>7</sub> H <sub>7</sub> N               | Vinylpyridine                       | 0.001±0.003 | 57.0  | NIST Database     |
| 107.044 | C <sub>6</sub> H <sub>5</sub> NO              | nitrosobenzene or pyridine aldehyde | 0.002±0.002 | 12.0  | Koss 2018         |
| 107.081 | C <sub>7</sub> H <sub>9</sub> N               | Toluidine                           | 0.004±0.005 | 3.2   | NIST Database     |
| 109.096 | C <sub>7</sub> H <sub>11</sub> N              | C7 acrylonitrile                    | 0.001±0.001 | 89.4  | Koss 2018         |
| 111.039 | C <sub>5</sub> H <sub>5</sub> NO <sub>2</sub> | Dihydroxy pyridine                  | 0.002±0.001 | 10.3  | Koss 2018         |
| 113.019 | C <sub>4</sub> H <sub>3</sub> NO <sub>3</sub> | Nitrofuran                          | 0.005±0.005 | 40.0  | Koss 2018         |
| 117.05  | C <sub>4</sub> H <sub>7</sub> NO <sub>3</sub> | Butene nitrates                     | 0.004±0.005 | 50.8  | Koss 2018         |
| 117.065 | C <sub>8</sub> H <sub>7</sub> N               | Indole                              | 0.003±0.003 | 1.2   | Koss 2018         |
| 119.081 | C <sub>8</sub> H <sub>9</sub> N               | Dihydro pyridine                    | 0.000±0.001 | 0.5   | Koss 2018         |
| 123.039 | C <sub>6</sub> H <sub>5</sub> NO <sub>2</sub> | Nitrobenzene                        | 0.003±0.005 | 0.1   | NIST Database     |
| 125.128 | C <sub>8</sub> H <sub>15</sub> N              | C8 nitriles                         | 0.000±0.001 | 8.0   | Koss 2018         |
| 131.081 | C <sub>9</sub> H <sub>9</sub> N               | Methyl indole                       | 0.001±0.001 | 5.6   | Koss 2018         |
| 137.055 | C <sub>7</sub> H <sub>7</sub> NO <sub>2</sub> | Nitrotoluene                        | 0.002±0.002 | 0.1   | Koss 2018         |
| 149.127 | C <sub>10</sub> H <sub>15</sub> N             | C10 aromatic amines                 | 0.000±0.001 | 148   | Pfannerstill 2019 |

## Reference :

- Atkinson, R., and Arey, J.: Atmospheric Degradation of Volatile Organic Compounds, Chemical Reviews, 103, 4605-4638, 10.1021/cr0206420, 2003.
- Atkinson, R., Baulch, D. L., Cox, R. A., Crowley, J. N., Hampson, R. F., Hynes, R. G., Jenkin, M. E., Rossi, M. J., and Troe, J.: Evaluated kinetic and photochemical data for atmospheric chemistry: Volume I - gas phase reactions of Ox, HOx, NOx and SOx species, Atmospheric Chemistry and Physics, 4, 1461-1738, 10.5194/acp-4-1461-2004, 2004.
- Atkinson, R., Baulch, D. L., Cox, R. A., Crowley, J. N., Hampson, R. F., Hynes, R. G., Jenkin, M. E., Rossi, M. J., Troe, J., and Subcommittee, I.: Evaluated kinetic and photochemical data for atmospheric chemistry: Volume II &ndash; gas phase reactions of organic species, Atmospheric Chemistry and Physics, 6, 3625-4055, 10.5194/acp-6-3625-2006, 2006.
- Cappellin, L., Karl, T., Probst, M., Ismailova, O., Winkler, P., Soukoulis, C., Aprea, E., Märk, T., Gasperi, F., and Biasioli, F.: On Quantitative Determination of Volatile Organic Compound Concentrations Using Proton Transfer Reaction Time-of-Flight Mass Spectrometry, Environmental science & technology, 46, 2283-2290, 10.1021/es203985t, 2012.
- de Gouw, J., Middlebrook, A., warneke, C., Goldan, P., Kuster, W., Roberts, J., Fehsenfeld, F., Worsnop, D., Pszenny, A., Keene, W., Marchewka, M., Bertman, S., and Bates, T.: Budget of organic carbon in a polluted atmosphere: Results from the New England Air Quality Study in 2002, Journal of Geophysical Research-Atmospheres, 110, D16305, 10.1029/2004JD005623, 2005.
- de Gouw, J., and Warneke, C.: Measurements of volatile organic compounds in the earth's atmosphere using proton-transfer-reaction mass spectrometry, Mass Spectrometry Reviews, 26, 223-257, 10.1002/mas.20119, 2007.
- de Gouw, J. A., Goldan, P. D., Warneke, C., Kuster, W. C., Roberts, J. M., Marchewka, M., Bertman, S. B., Pszenny, A. A. P., and Keene, W. C.: Validation of proton transfer reaction-mass spectrometry (PTR-MS) measurements of gas-phase organic compounds in the atmosphere during the New England Air Quality Study (NEAQS) in 2002, Journal of Geophysical Research: Atmospheres, 108, 10.1029/2003JD003863, 2003.
- de Gouw, J. A., Brock, C. A., Atlas, E. L., Bates, T. S., Fehsenfeld, F. C., Goldan, P. D., Holloway, J. S., Kuster, W. C., Lerner, B. M., Matthew, B. M., Middlebrook, A. M.,

Onasch, T. B., Peltier, R. E., Quinn, P. K., Senff, C. J., Stohl, A., Sullivan, A. P., Trainer, M., Warneke, C., Weber, R. J., and Williams, E. J.: Sources of particulate matter in the northeastern United States in summer: 1. Direct emissions and secondary formation of organic matter in urban plumes, *Journal of Geophysical Research: Atmospheres*, 113, 10.1029/2007jd009243, 2008.

Gilman, J. B., Lerner, B. M., Kuster, W. C., Goldan, P. D., Warneke, C., Veres, P. R., Roberts, J. M., de Gouw, J. A., Burling, I. R., and Yokelson, R. J.: Biomass burning emissions and potential air quality impacts of volatile organic compounds and other trace gases from fuels common in the US, *Atmospheric Chemistry and Physics*, 15, 13915-13938, 10.5194/acp-15-13915-2015, 2015.

Guenther, A., Jiang, J., Heald, C., Sakulyanontvittaya, Duhl, T., Emmons, L., and Wang, J.: The Model of Emissions of Gases and Aerosols from Nature version 2.1 (MEGAN2.1): An extended and updated framework for modeling biogenic emissions, *Geoscientific Model Development Discussions*, 5, 1-58, 10.5194/gmdd-5-1-2012, 2012.

Inomata, S., Tanimoto, H., Kameyama, S., Tsunogai, U., H, I., Kanaya, Y., and Wang, Z.: Technical Note: Determination of formaldehyde mixing ratios in air with PTR-MS: Laboratory experiments and field measurements, *Atmospheric Chemistry and Physics Discussions*, 8, 10.5194/acpd-7-12845-2007, 2008.

Karl, T., Striednig, M., Graus, M., Hammerle, A., and Wohlfahrt, G.: Urban flux measurements reveal a large pool of oxygenated volatile organic compound emissions, *Proceedings of the National Academy of Sciences*, 115, 1186-1191, 10.1073/pnas.1714715115, 2018.

Koss, A., Yuan, B., Warneke, C., Gilman, J. B., Lerner, B. M., Veres, P. R., Peischl, J., Eilerman, S., Wild, R., Brown, S. S., Thompson, C. R., Ryerson, T., Hanisco, T., Wolfe, G. M., Clair, J. M. S., Thayer, M., Keutsch, F. N., Murphy, S., and de Gouw, J.: Observations of VOC emissions and photochemical products over US oil- and gas-producing regions using high-resolution H<sub>3</sub>O<sup>+</sup> CIMS (PTR-ToF-MS), *Atmospheric Measurement Techniques*, 10, 2941-2968, 10.5194/amt-10-2941-2017, 2017.

Koss, A. R., Sekimoto, K., Gilman, J. B., Selimovic, V., Coggon, M. M., Zarzana, K. J., Yuan, B., Lerner, B. M., Brown, S. S., Jimenez, J. L., Krechmer, J., Roberts, J. M., Warneke, C., Yokelson, R. J., and de Gouw, J.: Non-methane organic gas emissions from biomass burning: identification, quantification, and emission factors from PTR-ToF during the FIREX 2016 laboratory experiment, *Atmospheric Chemistry and Physics*, 18, 3299-3319, 10.5194/acp-18-3299-2018, 2018.

564 Lopez-Hilfiker, F. D., Mohr, C., Ehn, M., Rubach, F., Kleist, E., Wildt, J., Mentel, T. F.,  
 565 Lutz, A., Hallquist, M., Worsnop, D., and Thornton, J. A.: A novel method for online  
 566 analysis of gas and particle composition: description and evaluation of a Filter Inlet for  
 567 Gases and AEROsols (FIGAERO), *Atmos. Meas. Tech.*, 7, 983-1001, 10.5194/amt-7-  
 568 983-2014, 2014.

569 Pfannerstill, E. Y., Wang, N., Edtbauer, A., Bourtsoukidis, E., Crowley, J. N., Dienhart,  
 570 D., Eger, P. G., Ernle, L., Fischer, H., Hottmann, B., Paris, J. D., Stöner, C., Tadic, I.,  
 571 Walter, D., Lelieveld, J., and Williams, J.: Shipborne measurements of total OH  
 572 reactivity around the Arabian Peninsula and its role in ozone chemistry, *Atmos. Chem.*  
 573 *Phys.*, 19, 11501-11523, 10.5194/acp-19-11501-2019, 2019.

574 Sanchez, D., Seco, R., Gu, D., Guenther, A., Mak, J., Lee, Y., Kim, D., Ahn, J., Blake,  
 575 D., Herndon, S., Jeong, D., Sullivan, J. T., McGee, T., and Kim, S.: Contributions to  
 576 OH reactivity from unexplored volatile organic compounds measured by PTR-ToF-MS  
 577 – A case study in a suburban forest of the Seoul Metropolitan Area during KORUS-AQ  
 578 2016, *Atmos. Chem. Phys. Discuss.*, 2020, 1-35, 10.5194/acp-2020-174, 2020.

579 Sekimoto, K., Li, S.-M., Yuan, B., Koss, A., Coggon, M., Warneke, C., and de Gouw,  
 580 J.: Calculation of the sensitivity of proton-transfer-reaction mass spectrometry (PTR-  
 581 MS) for organic trace gases using molecular properties, *International Journal of Mass*  
 582 *Spectrometry*, 421, 71-94, <https://doi.org/10.1016/j.ijms.2017.04.006>, 2017.

583 Stark, H., Yatavelli, R. L. N., Thompson, S. L., Kimmel, J. R., Cubison, M. J., Chhabra,  
 584 P. S., Canagaratna, M. R., Jayne, J. T., Worsnop, D. R., and Jimenez, J. L.: Methods to  
 585 extract molecular and bulk chemical information from series of complex mass spectra  
 586 with limited mass resolution, *International Journal of Mass Spectrometry*, 389, 26-38,  
 587 <https://doi.org/10.1016/j.ijms.2015.08.011>, 2015.

588 Stockwell, C., Veres, P., Williams, J., and Yokelson, R.: Characterization of biomass  
 589 burning emissions from cooking fires, peat, crop residue, and other fuels with high-  
 590 resolution proton-transfer-reaction time-of-flight mass spectrometry, *Atmospheric*  
 591 *Chemistry and Physics*, 15, 10.5194/acp-15-845-2015, 2015.

592 Sulzer, P., Hartungen, E., Hanel, G., Feil, S., Winkler, K., Mutschlechner, P., Haidacher,  
 593 S., Schotchkowsky, R., Gunsch, D., Seehauser, H., Striednig, M., Jürschik, S., Breiev, K.,  
 594 Lanza, M., Herbig, J., Märk, L., Märk, T., and Jordan, A.: A Proton Transfer Reaction-  
 595 Quadrupole interface Time-Of-Flight Mass Spectrometer (PTR-QiTOF): High speed  
 596 due to extreme sensitivity, *International Journal of Mass Spectrometry*, 368,  
 597 10.1016/j.ijms.2014.05.004, 2014.

Thornton, J., Mohr, C., Schobesberger, S., D'Ambro, E., Lee, B., and Lopez-Hilfiker, F.: Evaluating Organic Aerosol Sources and Evolution with a Combined Molecular Composition and Volatility Framework Using the Filter Inlet for Gases and Aerosols (FIGAERO), *Accounts of Chemical Research*, 53, 10.1021/acs.accounts.0c00259, 2020.

Vlasenko, A., Macdonald, A. M., Sjostedt, S. J., and Abbatt, J. P. D.: Formaldehyde measurements by Proton transfer reaction – Mass Spectrometry (PTR-MS): correction for humidity effects, *Atmospheric Measurement Techniques*, 3, 1055-1062, 10.5194/amt-3-1055-2010, 2010.

Wang, C., Wu, C., Wang, S., Qi, J., Wang, B., Wang, Z., Hu, W., Chen, W., Ye, C., Wang, W., Sun, Y., Wang, C., Huang, S., Song, W., Wang, X., Yang, S., Zhang, S., Xu, W., Ma, N., Zhang, Z., Jiang, B., Su, H., Cheng, Y., Wang, X., Shao, M., and Yuan, B.: Measurements of higher alkanes using NO+PTR-ToF-MS: significant contributions of higher alkanes to secondary organic aerosols in China, *Atmos. Chem. Phys. Discuss.*, 2020, 1-32, 10.5194/acp-2020-145, 2020a.

Wang, M., Zeng, L., Lu, S., Shao, M., Liu, X., Yu, X., Chen, W., Yuan, B., Zhang, Q., Hu, M., and Zhang, Z.: Development and validation of a cryogen-free automatic gas chromatograph system (GC-MS/FID) for online measurements of volatile organic compounds, *Anal. Methods*, 6, 10.1039/C4AY01855A, 2014.

Wang, Z., Yuan, B., Ye, C., Roberts, J., Wisthaler, A., Lin, Y., Li, T., Wu, C., Peng, Y., Wang, C., Wang, S., Yang, S., Wang, B., Qi, J., Wang, C., Song, W., Hu, W., Wang, X., Xu, W., Ma, N., Kuang, Y., Tao, J., Zhang, Z., Su, H., Cheng, Y., Wang, X., and Shao, M.: High Concentrations of Atmospheric Isocyanic Acid (HNCO) Produced from Secondary Sources in China, *Environmental Science & Technology*, 10.1021/acs.est.0c02843, 2020b.

Warneke, C., Veres, P., Holloway, J. S., Stutz, J., Tsai, C., Alvarez, S., Rappenglueck, B., Fehsenfeld, F. C., Graus, M., Gilman, J. B., and de Gouw, J. A.: Airborne formaldehyde measurements using PTR-MS: calibration, humidity dependence, inter-comparison and initial results, *Atmospheric Measurement Techniques*, 4, 2345-2358, 10.5194/amt-4-2345-2011, 2011.

Wolfe, G., Marvin, M., Roberts, S., Travis, K., and Liao, J.: The Framework for 0-D Atmospheric Modeling (F0AM) v3.1, *Geoscientific Model Development Discussions*, 1-21, 10.5194/gmd-2016-175, 2016.

Yuan, B., Chen, W., Shao, M., Wang, M., Lu, S., Wang, B., Liu, Y., Chang, C. C., and Wang, B.: Measurements of ambient hydrocarbons and carbonyls in the Pearl River

Delta (PRD), China, Atmospheric Research, 116, 93-104, 2012a.

Yuan, B., Shao, M., de Gouw, J., Parrish, D., Lu, S., Wang, M., Zeng, L., Zhang, Q., Song, Y., Zhang, J., and Hu, M.: Volatile organic compounds (VOCs) in urban air: How chemistry affects the interpretation of positive matrix factorization (PMF) analysis, *Journal of Geophysical Research (Atmospheres)*, 117, 24302, 10.1029/2012JD018236, 2012b.

Yuan, B., Koss, A. R., Warneke, C., Coggon, M., Sekimoto, K., and de Gouw, J. A.: Proton-Transfer-Reaction Mass Spectrometry: Applications in Atmospheric Sciences, *Chemical Reviews*, 117, 13187-13229, 10.1021/acs.chemrev.7b00325, 2017.

Zhang, H., Yee, L. D., Lee, B. H., Curtis, M. P., Worton, D. R., Isaacman-VanWertz, G., Offenberg, J. H., Lewandowski, M., Kleindienst, T. E., Beaver, M. R., Holder, A. L., Lonneman, W. A., Docherty, K. S., Jaoui, M., Pye, H. O. T., Hu, W., Day, D. A., Campuzano-Jost, P., Jimenez, J. L., Guo, H., Weber, R. J., de Gouw, J., Koss, A. R., Edgerton, E. S., Brune, W., Mohr, C., Lopez-Hilfiker, F. D., Lutz, A., Kreisberg, N. M., Spielman, S. R., Hering, S. V., Wilson, K. R., Thornton, J. A., and Goldstein, A. H.: Monoterpenes are the largest source of summertime organic aerosol in the southeastern United States, *Proceedings of the National Academy of Sciences*, 115, 2038-2043, 10.1073/pnas.1717513115, 2018.

Zhu, M., Dong, H., Yu, F., Liao, S., Xie, Y., Liu, J., Sha, Q., Zhong, Z., Zeng, L., and Zheng, J.: A New Portable Instrument for Online Measurements of Formaldehyde: From Ambient to Mobile Emission Sources, *Environmental Science & Technology Letters*, 7, 292-297, 10.1021/acs.estlett.0c00169, 2020.
